# Supplementary material for: ProteoViz: a tool for the analysis and interactive visualization of phosphoproteomics data
Source: Royal Society of Chemistry journal article supplement (doi:10.1039/c9mo00149b), 2020-04-29
Supplement: c9mo00149b2.xlsx [file c9mo00149b2.xlsx]

## Sheet: Sample_metadata
Sample	Enrichment	Batch	Replicate	Pool	Sample_name	Model_group
Reporter_intensity_corrected_4_TMT1	Lysate	0	1		Cell1_DMSO_1	Cell1_DMSO
Reporter_intensity_corrected_5_TMT1	Lysate	0	2		Cell1_DMSO_2	Cell1_DMSO
Reporter_intensity_corrected_6_TMT1	Lysate	0	3		Cell1_DMSO_3	Cell1_DMSO
Reporter_intensity_corrected_1_TMT1	Lysate	0	1		Cell1_inhibitor1_1	Cell1_inhibitor1
Reporter_intensity_corrected_2_TMT1	Lysate	0	2		Cell1_inhibitor1_2	Cell1_inhibitor1
Reporter_intensity_corrected_3_TMT1	Lysate	0	3		Cell1_inhibitor1_3	Cell1_inhibitor1
Reporter_intensity_corrected_7_TMT1	Lysate	0	1		Cell1_inhibitor2_1	Cell1_inhibitor2
Reporter_intensity_corrected_8_TMT1	Lysate	0	2		Cell1_inhibitor2_2	Cell1_inhibitor2
Reporter_intensity_corrected_9_TMT1	Lysate	0	3		Cell1_inhibitor2_3	Cell1_inhibitor2
Reporter_intensity_corrected_10_TMT1	Lysate	0		POOL
Reporter_intensity_corrected_4_TMT2	Lysate	1	1		Cell2_DMSO_1	Cell2_DMSO
Reporter_intensity_corrected_5_TMT2	Lysate	1	2		Cell2_DMSO_2	Cell2_DMSO
Reporter_intensity_corrected_6_TMT2	Lysate	1	3		Cell2_DMSO_3	Cell2_DMSO
Reporter_intensity_corrected_1_TMT2	Lysate	1	1		Cell2_inhibitor1_1	Cell2_inhibitor1
Reporter_intensity_corrected_8_TMT2	Lysate	1	2		Cell2_inhibitor1_2	Cell2_inhibitor1
Reporter_intensity_corrected_3_TMT2	Lysate	1	3		Cell2_inhibitor1_3	Cell2_inhibitor1
Reporter_intensity_corrected_7_TMT2	Lysate	1	1		Cell2_inhibitor2_1	Cell2_inhibitor2
Reporter_intensity_corrected_2_TMT2	Lysate	1	2		Cell2_inhibitor2_2	Cell2_inhibitor2
Reporter_intensity_corrected_9_TMT2	Lysate	1	3		Cell2_inhibitor2_3	Cell2_inhibitor2
Reporter_intensity_corrected_10_TMT2	Lysate	1		POOL
Reporter_intensity_corrected_4_TMT1phos	Phos	0	1		Cell1_DMSO_1	Cell1_DMSO
Reporter_intensity_corrected_5_TMT1phos	Phos	0	2		Cell1_DMSO_2	Cell1_DMSO
Reporter_intensity_corrected_6_TMT1phos	Phos	0	3		Cell1_DMSO_3	Cell1_DMSO
Reporter_intensity_corrected_1_TMT1phos	Phos	0	1		Cell1_inhibitor1_1	Cell1_inhibitor1
Reporter_intensity_corrected_2_TMT1phos	Phos	0	2		Cell1_inhibitor1_2	Cell1_inhibitor1
Reporter_intensity_corrected_3_TMT1phos	Phos	0	3		Cell1_inhibitor1_3	Cell1_inhibitor1
Reporter_intensity_corrected_7_TMT1phos	Phos	0	1		Cell1_inhibitor2_1	Cell1_inhibitor2
Reporter_intensity_corrected_8_TMT1phos	Phos	0	2		Cell1_inhibitor2_2	Cell1_inhibitor2
Reporter_intensity_corrected_9_TMT1phos	Phos	0	3		Cell1_inhibitor2_3	Cell1_inhibitor2
Reporter_intensity_corrected_10_TMT1phos	Phos	0		POOL
Reporter_intensity_corrected_4_TMT2phos	Phos	1	1		Cell2_DMSO_1	Cell2_DMSO
Reporter_intensity_corrected_5_TMT2phos	Phos	1	2		Cell2_DMSO_2	Cell2_DMSO
Reporter_intensity_corrected_6_TMT2phos	Phos	1	3		Cell2_DMSO_3	Cell2_DMSO
Reporter_intensity_corrected_1_TMT2phos	Phos	1	1		Cell2_inhibitor1_1	Cell2_inhibitor1
Reporter_intensity_corrected_8_TMT2phos	Phos	1	2		Cell2_inhibitor1_2	Cell2_inhibitor1
Reporter_intensity_corrected_3_TMT2phos	Phos	1	3		Cell2_inhibitor1_3	Cell2_inhibitor1
Reporter_intensity_corrected_7_TMT2phos	Phos	1	1		Cell2_inhibitor2_1	Cell2_inhibitor2
Reporter_intensity_corrected_2_TMT2phos	Phos	1	2		Cell2_inhibitor2_2	Cell2_inhibitor2
Reporter_intensity_corrected_9_TMT2phos	Phos	1	3		Cell2_inhibitor2_3	Cell2_inhibitor2
Reporter_intensity_corrected_10_TMT2phos	Phos	1		POOL
