# Supplementary material for: ProteoViz: a tool for the analysis and interactive visualization of phosphoproteomics data
Source: Royal Society of Chemistry journal article supplement (doi:10.1039/c9mo00149b), 2020-04-29
Supplement: c9mo00149b3.xlsx [file c9mo00149b3.xlsx]

## Sheet: contrast_matrix
Contrast_name
Cell2_DMSO - Cell1_DMSO
Cell1_inhibitor1 - Cell1_DMSO
Cell1_inhibitor2 - Cell1_DMSO
Cell2_inhibitor1 - Cell2_DMSO
Cell2_inhibitor2 - Cell2_DMSO
