# Supplementary figures and images for: ProteoViz: a tool for the analysis and interactive visualization of phosphoproteomics data
Source: Royal Society of Chemistry journal article supplement (doi:10.1039/c9mo00149b), 2020-04-29

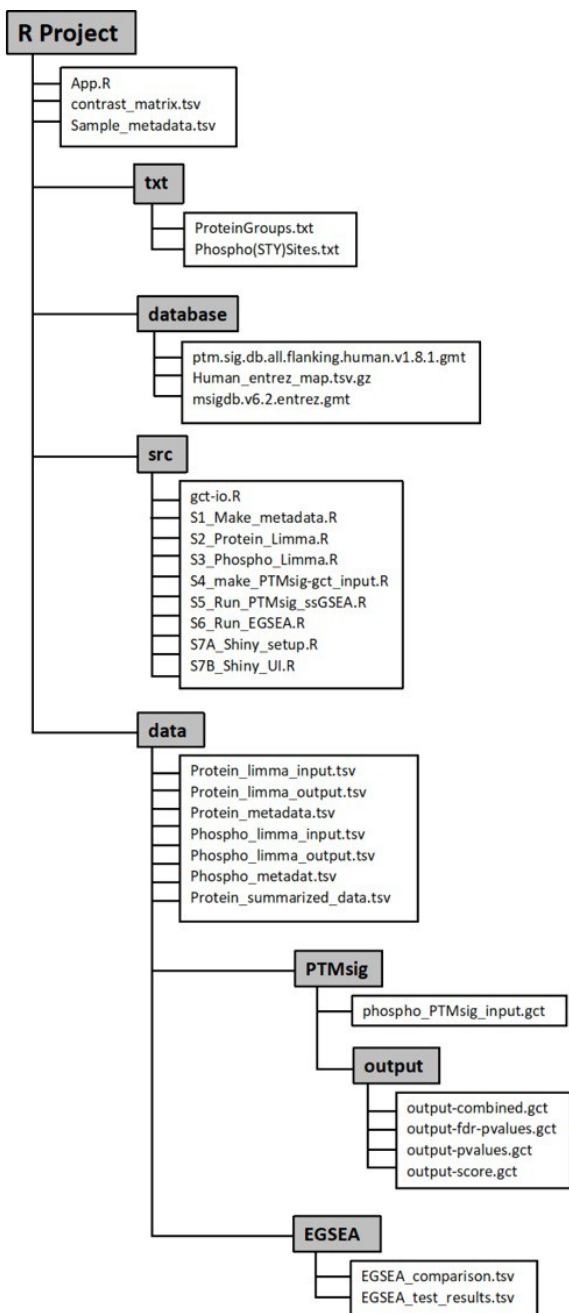

Supplement: c9mo00149b1.pdf [file c9mo00149b1.pdf]
